# Supplementary material for: Bobbing chemical garden tubes: oscillatory self-motion from buoyancy and catalytic gas production
Source: Royal Society of Chemistry journal article supplement (doi:10.1039/d2sm01681h), 2023-01-01
Supplement: d2sm01681h2.pdf [file d2sm01681h2.pdf]

## Electronic Supplementary Information

# Bobbing chemical garden tubes: oscillatory self-motion from buoyancy and catalytic gas production

Qingpu Wang<sup>‡</sup> and Oliver Steinbock\*

Department of Chemistry and Biochemistry, Florida State University

Tallahassee, FL 32306-4390, USA

\* E-mail: osteinbock@fsu.edu

<sup>‡</sup> Present address: Energy and Environment Directorate, Pacific Northwest National Laboratory, Seattle, WA 98109, USA

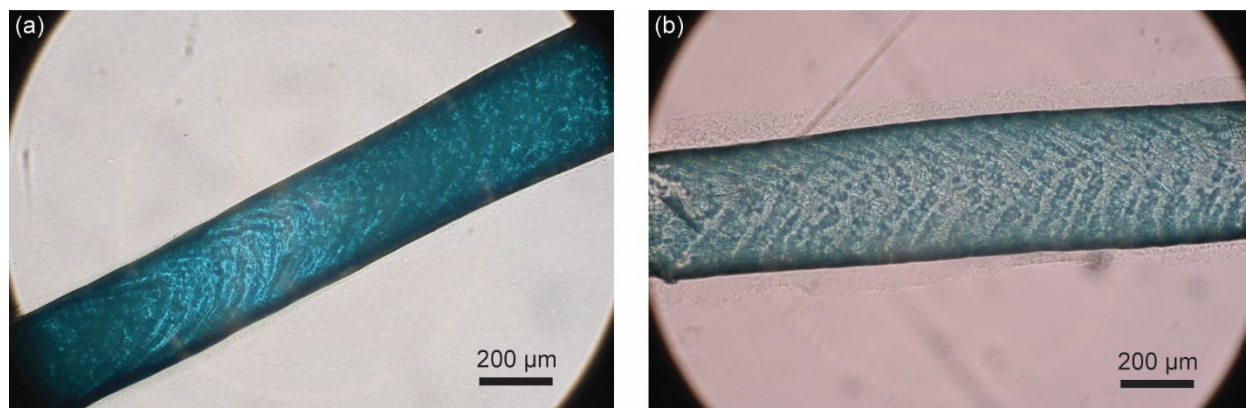

**Fig. S1** Optical micrographs of silica-Cu(OH)<sub>2</sub> precipitate tubes. These samples are representative of the tubes used in our study (prior to H<sub>2</sub>O<sub>2</sub> exposure). The tube walls show spatially periodic stripe patterns that might indicate minor variations in the local surface roughness and (as judged from the color variations) variations in the silicon-to-copper ratio. We note that earlier studies reported similar stripe patterns for chemical garden tubes prepared under similar conditions.<sup>S1,S2</sup> These studies showed that the stripe patterns are also discernable from SEM images.

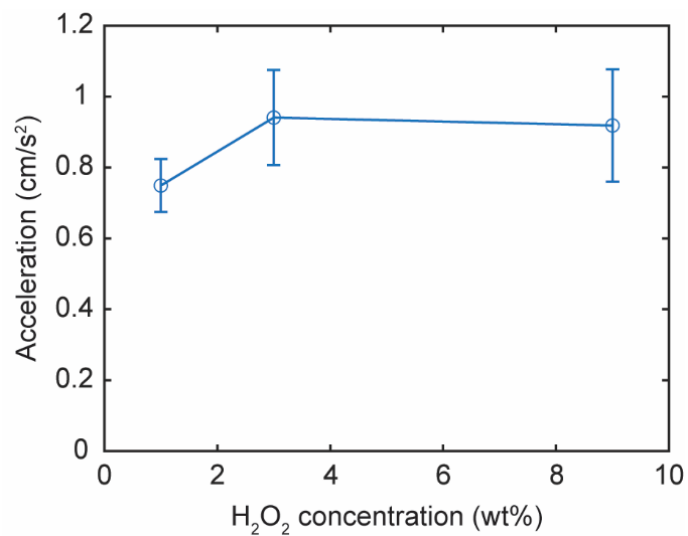

**Fig. S2** Tube acceleration versus the concentration of H<sub>2</sub>O<sub>2</sub>. The error bars indicate standard deviations from four measurements. These results possibly suggest a mild concentration-dependent acceleration (and hence the rate constant  $k$ ) during the ascent phase.

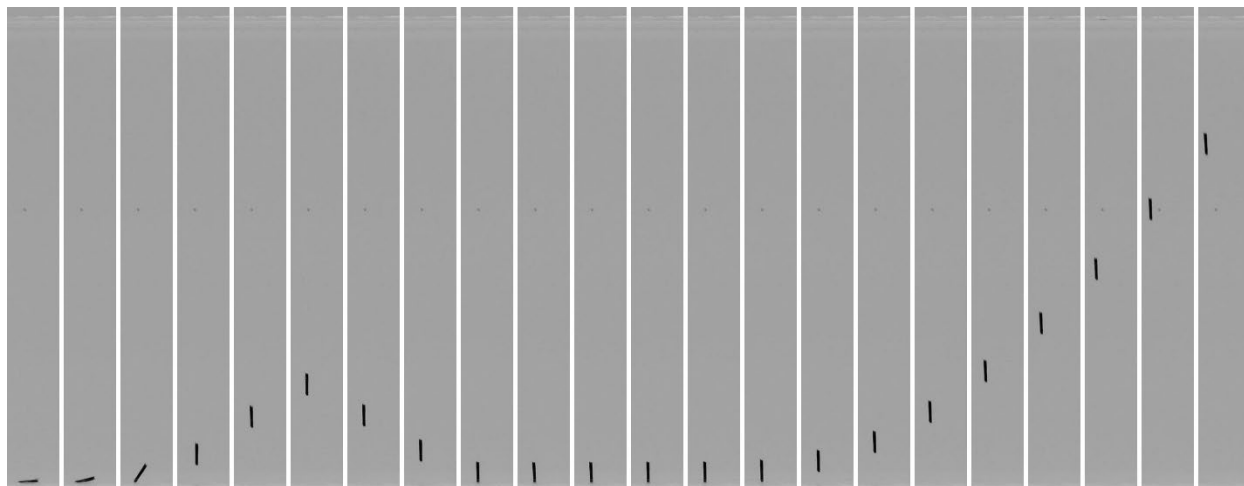

**Fig. S3** Image sequence showing the motion of a tube at 0.5 s intervals. The time increases from left to right. In this example, the ascending motion aborted (sixth frame) due to the release of the buoyancy-providing gas bubble. Field of view:  $55 \times 6 \text{ mm}^2$ . Concentration of H<sub>2</sub>O<sub>2</sub>: 1 %.

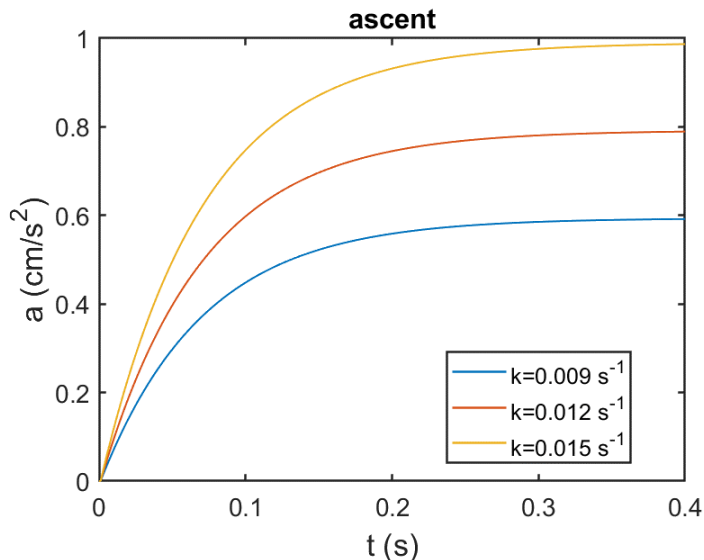

**Fig. S4** Calculated acceleration of ascending tubes for three rate constants  $k$ . The figure complements the data shown in Fig. 6. Notice that the terminal velocities are reached in about 0.3 s.

**Movie S1.** Real-time movie showing the bobbing motion of a chemical garden tube in a 1%  $\text{H}_2\text{O}_2$  solution. Field of view:  $10 \times 60 \text{ mm}^2$ .

## References

- S1. See Fig. 8a in: J. J. Pagano, S. Thouvenel-Romans and O. Steinbock, "Compositional Analysis of Copper-silica Precipitation Tubes", *Phys. Chem. Chem. Phys.* **9**, 110-118, 2007.
- S2. See Fig. 8 in: S. Thouvenel-Romans, J. J. Pagano and O. Steinbock, "Bubble Guidance of Tubular Growth in Reaction-precipitation Systems", *Phys. Chem. Chem. Phys.* **7**, 2610-2615, 2005.
